# Supplementary material for: Lipidomics Reveals Myocardial Lipid Composition in a Murine Model of Insulin Resistance Induced by a High-Fat Diet
Source: MDPI journal article supplement (doi:10.3390/ijms25052702), 2024-02-26
Supplement: s1 [file s1]

**Table S1.** Spearman's correlation between the altered myocardial metabolites and weight and biochemical variables related to glucose and fatty acid metabolism. Significant differences are indicated in bold.

| Metabolites        | Weight |       | Triglycerides |       | NEFA  |       | Total Cholesterol |       | HDLc   |       | LDLc   |       | VLDLc |       | Glucose |       | Insulin |       | HOMA-IR |       | GTT   |       | Leptin |       | Resistin |       | Adiponectin |       |
|--------------------|--------|-------|---------------|-------|-------|-------|-------------------|-------|--------|-------|--------|-------|-------|-------|---------|-------|---------|-------|---------|-------|-------|-------|--------|-------|----------|-------|-------------|-------|
| Triglycerides      | r      | p     | r             | p     | r     | p     | r                 | p     | r      | p     | r      | p     | r     | p     | r       | p     | r       | p     | r       | p     | r     | p     | r      | p     | r        | p     | r           | p     |
| Mix TG (49:1)      | 0.311  | 0.260 | 0.656         | 0.011 | 0.364 | 0.182 | -0.231            | 0.408 | -0.325 | 0.237 | -0.420 | 0.119 | 0.634 | 0.011 | 0.706   | 0.005 | 0.373   | 0.210 | 0.479   | 0.098 | 0.520 | 0.047 | 0.692  | 0.006 | 0.604    | 0.029 | -0.400      | 0.140 |
| Mix TG (47:1)      | 0.375  | 0.168 | 0.675         | 0.008 | 0.318 | 0.248 | -0.354            | 0.196 | -0.481 | 0.070 | -0.474 | 0.074 | 0.631 | 0.012 | 0.702   | 0.005 | 0.287   | 0.378 | 0.374   | 0.208 | 0.488 | 0.065 | 0.736  | 0.003 | 0.440    | 0.133 | -0.546      | 0.025 |
| Mix TG (51:1)      | 0.250  | 0.369 | 0.661         | 0.012 | 0.407 | 0.132 | -0.188            | 0.503 | -0.239 | 0.390 | -0.462 | 0.083 | 0.656 | 0.006 | 0.612   | 0.020 | 0.384   | 0.195 | 0.470   | 0.105 | 0.504 | 0.055 | 0.616  | 0.016 | 0.643    | 0.018 | -0.343      | 0.211 |
| Mix TG (49:2)      | 0.290  | 0.369 | 0.616         | 0.019 | 0.425 | 0.114 | -0.188            | 0.503 | -0.261 | 0.348 | -0.408 | 0.131 | 0.613 | 0.015 | 0.605   | 0.022 | 0.317   | 0.291 | 0.428   | 0.143 | 0.427 | 0.112 | 0.644  | 0.013 | 0.555    | 0.049 | -0.461      | 0.094 |
| Mix TG (51:2)      | 0.239  | 0.390 | 0.642         | 0.013 | 0.430 | 0.104 | -0.148            | 0.598 | -0.161 | 0.567 | -0.447 | 0.095 | 0.652 | 0.008 | 0.546   | 0.044 | 0.389   | 0.188 | 0.490   | 0.089 | 0.438 | 0.103 | 0.534  | 0.049 | 0.632    | 0.021 | -0.350      | 0.201 |
| Mix TG (42:0)      | 0.261  | 0.348 | 0.664         | 0.010 | 0.429 | 0.111 | -0.209            | 0.454 | -0.338 | 0.218 | -0.343 | 0.210 | 0.627 | 0.012 | 0.779   | 0.001 | 0.398   | 0.178 | 0.539   | 0.057 | 0.436 | 0.104 | 0.701  | 0.005 | 0.462    | 0.112 | -0.521      | 0.046 |
| Mix TG (45:1)      | 0.443  | 0.098 | 0.700         | 0.005 | 0.339 | 0.216 | -0.391            | 0.149 | -0.488 | 0.005 | -0.540 | 0.038 | 0.649 | 0.009 | 0.579   | 0.030 | 0.120   | 0.697 | 0.223   | 0.464 | 0.499 | 0.058 | 0.653  | 0.011 | 0.335    | 0.263 | -0.643      | 0.019 |
| Mix TG (44:0)      | 0.207  | 0.459 | 0.634         | 0.015 | 0.418 | 0.121 | -0.213            | 0.447 | -0.272 | 0.327 | -0.447 | 0.095 | 0.627 | 0.012 | 0.587   | 0.027 | 0.348   | 0.244 | 0.437   | 0.135 | 0.406 | 0.134 | 0.609  | 0.021 | 0.511    | 0.074 | -0.471      | 0.076 |
| TG (53:6)          | 0.457  | 0.087 | 0.678         | 0.008 | 0.471 | 0.076 | -0.157            | 0.576 | -0.327 | 0.234 | -0.254 | 0.381 | 0.581 | 0.023 | 0.704   | 0.005 | 0.456   | 0.117 | 0.476   | 0.100 | 0.720 | 0.002 | 0.719  | 0.004 | 0.582    | 0.037 | -0.593      | 0.020 |
| Mix TG (53:1)      | 0.196  | 0.483 | 0.683         | 0.007 | 0.382 | 0.180 | -0.225            | 0.420 | -0.143 | 0.611 | -0.389 | 0.021 | 0.728 | 0.002 | 0.444   | 0.111 | 0.573   | 0.041 | 0.622   | 0.023 | 0.270 | 0.331 | 0.345  | 0.227 | 0.423    | 0.150 | -0.296      | 0.283 |
| Mix TG (53:2)      | 0.179  | 0.524 | 0.559         | 0.036 | 0.293 | 0.289 | -0.181            | 0.520 | -0.172 | 0.541 | -0.433 | 0.107 | 0.584 | 0.022 | 0.464   | 0.094 | 0.426   | 0.147 | 0.514   | 0.072 | 0.384 | 0.127 | 0.451  | 0.106 | 0.544    | 0.055 | -0.229      | 0.413 |
| Mix TG (O-51:4), O | 0.211  | 0.451 | 0.599         | 0.038 | 0.425 | 0.114 | -0.148            | 0.598 | -0.154 | 0.584 | -0.408 | 0.131 | 0.581 | 0.023 | 0.510   | 0.062 | 0.353   | 0.236 | 0.459   | 0.114 | 0.395 | 0.145 | 0.516  | 0.059 | 0.999    | 0.031 | -0.346      | 0.206 |
| Mix TG (O-52:8)    | 0.482  | 0.069 | 0.589         | 0.027 | 0.382 | 0.180 | -0.272            | 0.327 | -0.395 | 0.145 | -0.386 | 0.155 | 0.548 | 0.034 | 0.713   | 0.004 | 0.278   | 0.357 | 0.377   | 0.204 | 0.520 | 0.047 | 0.692  | 0.006 | 0.434    | 0.138 | -0.600      | 0.018 |
| Mix TG (47:0)      | 0.307  | 0.265 | 0.687         | 0.007 | 0.418 | 0.121 | -0.270            | 0.331 | -0.406 | 0.134 | -0.403 | 0.137 | 0.642 | 0.010 | 0.779   | 0.001 | 0.495   | 0.085 | 0.575   | 0.040 | 0.527 | 0.043 | 0.705  | 0.005 | 0.473    | 0.103 | -0.532      | 0.041 |
| Mix TG (40:0)      | 0.275  | 0.321 | 0.726         | 0.003 | 0.329 | 0.232 | -0.332            | 0.226 | -0.447 | 0.095 | -0.463 | 0.062 | 0.685 | 0.005 | 0.735   | 0.003 | 0.351   | 0.240 | 0.456   | 0.100 | 0.408 | 0.132 | 0.697  | 0.006 | 0.429    | 0.144 | -0.500      | 0.058 |
| Mix TG (O-53:4), O | 0.111  | 0.694 | 0.408         | 0.147 | 0.325 | 0.237 | -0.107            | 0.704 | -0.070 | 0.805 | -0.351 | 0.200 | 0.477 | 0.072 | 0.301   | 0.295 | 0.348   | 0.244 | 0.454   | 0.119 | 0.349 | 0.203 | 0.367  | 0.197 | 0.485    | 0.086 | -0.236      | 0.398 |
| Mix TG (46:0)      | 0.062  | 0.771 | 0.514         | 0.080 | 0.332 | 0.228 | -0.163            | 0.562 | -0.175 | 0.532 | -0.408 | 0.131 | 0.548 | 0.034 | 0.420   | 0.135 | 0.339   | 0.257 | 0.415   | 0.158 | 0.398 | 0.268 | 0.481  | 0.081 | 0.440    | 0.133 | -0.343      | 0.211 |
| Mix TG (45:2)      | 0.338  | 0.216 | 0.599         | 0.027 | 0.525 | 0.044 | -0.179            | 0.524 | -0.231 | 0.408 | -0.397 | 0.143 | 0.586 | 0.020 | 0.489   | 0.078 | 0.186   | 0.542 | 0.305   | 0.310 | 0.436 | 0.103 | 0.534  | 0.048 | 0.467    | 0.108 | -0.681      | 0.007 |
| Mix TG (49:0)      | 0.250  | 0.369 | 0.700         | 0.005 | 0.418 | 0.121 | -0.273            | 0.324 | -0.365 | 0.181 | -0.442 | 0.099 | 0.685 | 0.005 | 0.669   | 0.009 | 0.512   | 0.074 | 0.558   | 0.047 | 0.415 | 0.124 | 0.626  | 0.017 | 0.478    | 0.098 | -0.504      | 0.056 |
| Mix TG (43:0)      | 0.311  | 0.260 | 0.642         | 0.013 | 0.486 | 0.096 | -0.177            | 0.528 | -0.189 | 0.499 | -0.479 | 0.071 | 0.638 | 0.010 | 0.482   | 0.081 | 0.334   | 0.265 | 0.413   | 0.161 | 0.388 | 0.153 | 0.407  | 0.149 | 0.346    | 0.247 | -0.614      | 0.015 |
| TG(O-54:7)         | 0.336  | 0.221 | 0.722         | 0.004 | 0.336 | 0.221 | -0.306            | 0.268 | -0.354 | 0.196 | -0.626 | 0.044 | 0.695 | 0.004 | 0.667   | 0.009 | 0.451   | 0.122 | 0.517   | 0.070 | 0.545 | 0.036 | 0.574  | 0.032 | 0.582    | 0.037 | -0.393      | 0.147 |
| Mix TG (55:6)      | 0.400  | 0.140 | 0.642         | 0.013 | 0.543 | 0.037 | -0.197            | 0.482 | -0.347 | 0.205 | -0.297 | 0.282 | 0.595 | 0.019 | 0.658   | 0.011 | 0.353   | 0.236 | 0.421   | 0.152 | 0.620 | 0.014 | 0.684  | 0.007 | 0.500    | 0.082 | -0.732      | 0.002 |
| Mix TG (55:7)      | 0.500  | 0.058 | 0.669         | 0.009 | 0.454 | 0.089 | -0.163            | 0.562 | -0.352 | 0.131 | -0.301 | 0.276 | 0.581 | 0.023 | 0.625   | 0.017 | 0.253   | 0.404 | 0.286   | 0.343 | 0.767 | 0.001 | 0.802  | 0.001 | 0.615    | 0.026 | -0.661      | 0.039 |
| Mix TG (45:0)      | 0.411  | 0.092 | 0.682         | 0.007 | 0.339 | 0.216 | -0.338            | 0.216 | -0.393 | 0.147 | -0.408 | 0.083 | 0.627 | 0.010 | 0.760   | 0.005 | 0.442   | 0.136 | 0.492   | 0.087 | 0.482 | 0.053 | 0.736  | 0.003 | 0.440    | 0.133 | -0.546      | 0.025 |
| Mix TG (O-54:5), O | 0.221  | 0.428 | 0.538         | 0.014 | 0.329 | 0.232 | -0.243            | 0.383 | -0.263 | 0.344 | -0.485 | 0.067 | 0.642 | 0.010 | 0.598   | 0.024 | 0.456   | 0.117 | 0.523   | 0.067 | 0.449 | 0.053 | 0.538  | 0.047 | 0.577    | 0.039 | -0.300      | 0.277 |
| Mix TG (55:2)      | 0.154  | 0.585 | 0.519         | 0.057 | 0.311 | 0.280 | -0.152            | 0.589 | -0.129 | 0.648 | -0.424 | 0.115 | 0.552 | 0.033 | 0.385   | 0.174 | 0.431   | 0.141 | 0.501   | 0.081 | 0.429 | 0.111 | 0.402  | 0.154 | 0.660    | 0.046 | -0.204      | 0.467 |
| Mix TG (O-55:7), O | 0.314  | 0.254 | 0.475         | 0.086 | 0.511 | 0.052 | 0.120             | 0.671 | -0.032 | 0.909 | -0.075 | 0.790 | 0.437 | 0.103 | 0.519   | 0.057 | 0.412   | 0.162 | 0.484   | 0.094 | 0.744 | 0.001 | 0.635  | 0.015 | 0.588    | 0.035 | -0.379      | 0.164 |
| Mix TG (O-55:4), O | 0.154  | 0.585 | 0.430         | 0.124 | 0.250 | 0.369 | -0.091            | 0.747 | -0.043 | 0.679 | -0.422 | 0.117 | 0.495 | 0.061 | 0.235   | 0.418 | 0.409   | 0.165 | 0.457   | 0.117 | 0.391 | 0.149 | 0.297  | 0.303 | 0.429    | 0.144 | -0.154      | 0.585 |
| Mix TG (53:3)      | 0.232  | 0.405 | 0.351         | 0.219 | 0.329 | 0.232 | -0.045            | 0.874 | -0.043 | 0.879 | -0.279 | 0.314 | 0.401 | 0.138 | 0.363   | 0.202 | 0.303   | 0.314 | 0.391   | 0.187 | 0.393 | 0.147 | 0.429  | 0.126 | 0.484    | 0.094 | -0.236      | 0.398 |
| Mix TG (57:2)      | 0.204  | 0.467 | 0.257         | 0.100 | 0.293 | 0.288 | -0.123            | 0.861 | -0.116 | 0.880 | -0.388 | 0.133 | 0.487 | 0.065 | 0.392   | 0.166 | 0.485   | 0.110 | 0.492   | 0.087 | 0.482 | 0.053 | 0.420  | 0.135 | 0.585    | 0.049 | -0.154      | 0.585 |
| Mix TG (O-55:6), O | 0.093  | 0.742 | 0.395         | 0.184 | 0.444 | 0.045 | 0.874             | 0.045 | -0.184 | 0.874 | -0.222 | 0.427 | 0.496 | 0.145 | 0.502   | 0.076 | 0.408   | 0.314 | 0.476   | 0.076 | 0.465 | 0.143 | 0.363  | 0.147 | 0.438    | 0.161 | -0.341      | 0.461 |
| Mix TG (O-49:1), O | 0.354  | 0.196 | 0.709         | 0.005 | 0.304 | 0.271 | -0.415            | 0.124 | -0.531 | 0.042 | -0.465 | 0.081 | 0.567 | 0.007 | 0.704   | 0.005 | 0.426   | 0.147 | 0.451   | 0.122 | 0.426 | 0.104 | 0.719  | 0.004 | 0.485    | 0.090 | -0.544      | 0.025 |
| Mix TG (54:6)      | 0.279  | 0.315 | 0.603         | 0.023 | 0.281 | 0.348 | -0.189            | 0.499 | -0.354 | 0.305 | -0.352 | 0.198 | 0.570 | 0.027 | 0.453   | 0.104 | 0.453   | 0.120 | 0.421   | 0.152 | 0.615 | 0.015 | 0.596  | 0.025 | 0.588    | 0.035 | -0.254      | 0.362 |
| Mix TG (51:0)      | 0.229  | 0.413 | 0.620         | 0.018 | 0.375 | 0.168 | -0.211            | 0.451 | -0.262 | 0.308 | -0.376 | 0.168 | 0.602 | 0.018 | 0.663   | 0.011 | 0.434   | 0.138 | 0.476   | 0.100 | 0.384 | 0.157 | 0.635  | 0.015 | 0.473    | 0.103 | -0.404      | 0.136 |
| Mix TG (O-54:6)    | 0.275  | 0.321 | 0.510         | 0.062 | 0.271 | 0.328 | -0.166            | 0.554 | -0.270 | 0.331 | -0.295 | 0.    |       |       |         |       |         |       |         |       |       |       |        |       |          |       |             |       |
