# Supplementary material for: Lipidomics Reveals Myocardial Lipid Composition in a Murine Model of Insulin Resistance Induced by a High-Fat Diet
Source: MDPI journal article supplement (doi:10.3390/ijms25052702), 2024-02-26
Supplement: s1 [file s1]

**Table S2.** Spearman's correlation between the altered myocardial metabolites and liver TG. Significant differences are indicated in bold.

| Metabolites        | TG(51:2) |        | TG(51:1) |        | TG(49:1) |        | TG(53:1) |        | TG(46:0) |        | TG(49:2) |       | TG(49:0) |        | TG(44:1) |       | TG(47:0) |       | TG(44:0) |       | TG(43:1) |         | TG(48:1) |       | TG(52:5) |       | TG(48:0) |        |        |
|--------------------|----------|--------|----------|--------|----------|--------|----------|--------|----------|--------|----------|-------|----------|--------|----------|-------|----------|-------|----------|-------|----------|---------|----------|-------|----------|-------|----------|--------|--------|
|                    | r        | p      | r        | p      | r        | p      | r        | p      | r        | p      | r        | p     | r        | p      | r        | p     | r        | p     | r        | p     | r        | p       | r        | p     | r        | p     | r        | p      |        |
| Triglycerides      |          |        |          |        |          |        |          |        |          |        |          |       |          |        |          |       |          |       |          |       |          |         |          |       |          |       |          |        |        |
| Mix TG (49:1)      | 0.689    | 0.004  | 0.654    | 0.008  | 0.668    | 0.007  | 0.589    | 0.021  | 0.704    | 0.003  | 0.546    | 0.035 | 0.654    | 0.008  | 0.411    | 0.128 | 0.675    | 0.006 | 0.564    | 0.028 | 0.332    | 0.228   | 0.432    | 0.108 | 0.389    | 0.152 | 0.646    | 0.009  |        |
| Mix TG (47:1)      | 0.714    | 0.003  | 0.704    | 0.003  | 0.700    | 0.004  | 0.700    | 0.004  | 0.761    | 0.001  | 0.561    | 0.030 | 0.718    | 0.003  | 0.438    | 0.104 | 0.696    | 0.004 | 0.646    | 0.009 | 0.282    | 0.308   | 0.532    | 0.041 | 0.418    | 0.121 | 0.614    | 0.015  |        |
| Mix TG (51:1)      | 0.654    | 0.007  | 0.589    | 0.021  | 0.611    | 0.016  | 0.518    | 0.048  | 0.679    | 0.005  | 0.554    | 0.066 | 0.611    | 0.016  | 0.389    | 0.152 | 0.643    | 0.010 | 0.639    | 0.036 | 0.325    | 0.237   | 0.407    | 0.132 | 0.367    | 0.191 | 0.657    | 0.008  |        |
| Mix TG (49:2)      | 0.650    | 0.009  | 0.614    | 0.015  | 0.632    | 0.011  | 0.550    | 0.034  | 0.671    | 0.006  | 0.496    | 0.066 | 0.679    | 0.024  | 0.400    | 0.140 | 0.679    | 0.024 | 0.507    | 0.054 | 0.314    | 0.254   | 0.414    | 0.125 | 0.329    | 0.232 | 0.596    | 0.022  |        |
| Mix TG (51:2)      | 0.611    | 0.016  | 0.529    | 0.043  | 0.564    | 0.028  | 0.461    | 0.084  | 0.646    | 0.009  | 0.471    | 0.076 | 0.561    | 0.030  | 0.389    | 0.156 | 0.579    | 0.024 | 0.493    | 0.062 | 0.343    | 0.211   | 0.361    | 0.167 | 0.321    | 0.243 | 0.650    | 0.009  |        |
| Mix TG (42:0)      | 0.679    | 0.005  | 0.707    | 0.003  | 0.711    | 0.003  | 0.643    | 0.010  | 0.661    | 0.007  | 0.504    | 0.056 | 0.618    | 0.014  | 0.357    | 0.191 | 0.621    | 0.013 | 0.482    | 0.069 | 0.243    | 0.383   | 0.382    | 0.160 | 0.339    | 0.216 | 0.539    | 0.038  |        |
| Mix TG (45:1)      | 0.750    | 0.001  | 0.682    | 0.005  | 0.682    | 0.005  | 0.754    | 0.001  | 0.779    | 0.001  | 0.582    | 0.023 | 0.793    | <0.001 | 0.457    | 0.087 | 0.736    | 0.002 | 0.714    | 0.003 | 0.271    | 0.528   | 0.582    | 0.023 | 0.489    | 0.064 | 0.629    | 0.012  |        |
| Mix TG (44:0)      | 0.661    | 0.007  | 0.618    | 0.014  | 0.629    | 0.012  | 0.561    | 0.030  | 0.675    | 0.006  | 0.471    | 0.076 | 0.589    | 0.021  | 0.371    | 0.173 | 0.582    | 0.023 | 0.493    | 0.062 | 0.279    | 0.315   | 0.404    | 0.136 | 0.311    | 0.260 | 0.614    | 0.015  |        |
| TG (53:6)          | 0.689    | <0.001 | 0.600    | <0.001 | 0.782    | 0.001  | 0.768    | 0.001  | 0.601    | 0.035  | <0.001   | 0.725 | 0.002    | 0.646  | <0.001   | 0.575 | 0.025    | 0.636 | <0.001   | 0.700 | 0.004    | 0.461   | 0.084    | 0.650 | 0.009    | 0.561 | 0.030    | 0.636  | <0.001 |
| Mix TG (53:1)      | 0.450    | 0.092  | 0.396    | 0.143  | 0.432    | 0.108  | 0.379    | 0.164  | 0.443    | 0.019  | 0.382    | 0.160 | 0.511    | 0.052  | 0.343    | 0.211 | 0.324    | 0.226 | 0.482    | 0.069 | 0.279    | 0.315   | 0.346    | 0.206 | 0.214    | 0.443 | 0.711    | 0.063  |        |
| Mix TG (53:2)      | 0.629    | 0.043  | 0.443    | 0.096  | 0.469    | 0.079  | 0.375    | 0.164  | 0.582    | 0.023  | 0.418    | 0.121 | 0.514    | 0.050  | 0.321    | 0.243 | 0.536    | 0.040 | 0.450    | 0.092 | 0.318    | 0.248   | 0.325    | 0.232 | 0.282    | 0.308 | 0.646    | 0.009  |        |
| Mix TG (O-51:4): O | 0.696    | 0.019  | 0.614    | 0.050  | 0.557    | 0.031  | 0.439    | 0.101  | 0.593    | 0.020  | 0.439    | 0.101 | 0.518    | 0.048  | 0.343    | 0.211 | 0.536    | 0.040 | 0.436    | 0.104 | 0.318    | 0.248   | 0.311    | 0.260 | 0.311    | 0.260 | 0.596    | 0.019  |        |
| Mix TG (O-52:0)    | 0.721    | 0.002  | 0.711    | 0.003  | 0.729    | 0.002  | 0.693    | 0.004  | 0.600    | <0.001 | 0.614    | 0.015 | 0.700    | 0.004  | 0.536    | 0.040 | 0.668    | 0.007 | 0.668    | 0.007 | 0.379    | 0.164   | 0.589    | 0.021 | 0.443    | 0.098 | 0.668    | 0.007  |        |
| Mix TG (47:0)      | 0.732    | 0.002  | 0.725    | 0.002  | 0.714    | 0.003  | 0.679    | 0.005  | 0.764    | 0.001  | 0.546    | 0.035 | 0.707    | 0.003  | 0.421    | 0.118 | 0.700    | 0.004 | 0.664    | 0.017 | 0.268    | 0.334   | 0.529    | 0.043 | 0.361    | 0.187 | 0.686    | 0.005  |        |
| Mix TG (40:0)      | 0.654    | 0.008  | 0.671    | 0.006  | 0.664    | 0.007  | 0.650    | 0.009  | 0.689    | 0.004  | 0.469    | 0.064 | 0.654    | 0.008  | 0.343    | 0.211 | 0.646    | 0.009 | 0.546    | 0.035 | 0.207    | 0.459   | 0.414    | 0.125 | 0.343    | 0.211 | 0.587    | 0.031  |        |
| Mix TG (O-53:4): O | 0.629    | 0.043  | 0.382    | 0.180  | 0.418    | 0.121  | 0.325    | 0.237  | 0.464    | 0.081  | 0.361    | 0.187 | 0.457    | 0.087  | 0.246    | 0.376 | 0.471    | 0.076 | 0.350    | 0.201 | 0.282    | 0.308   | 0.243    | 0.383 | 0.289    | 0.296 | 0.587    | 0.031  |        |
| Mix TG (46:0)      | 0.564    | 0.028  | 0.493    | 0.082  | 0.500    | 0.056  | 0.421    | 0.118  | 0.587    | 0.031  | 0.379    | 0.164 | 0.468    | 0.079  | 0.282    | 0.308 | 0.471    | 0.076 | 0.375    | 0.168 | 0.250    | 0.369   | 0.285    | 0.246 | 0.378    | 0.246 | 0.564    | 0.028  |        |
| Mix TG (45:2)      | 0.682    | 0.005  | 0.582    | 0.023  | 0.607    | 0.016  | 0.582    | 0.023  | 0.729    | 0.002  | 0.482    | 0.060 | 0.621    | 0.013  | 0.481    | 0.084 | 0.584    | 0.032 | 0.679    | 0.024 | 0.296    | 0.283   | 0.536    | 0.040 | 0.329    | 0.232 | 0.650    | 0.009  |        |
| Mix TG (49:0)      | 0.650    | 0.009  | 0.625    | 0.013  | 0.614    | 0.015  | 0.579    | 0.024  | 0.743    | 0.002  | 0.468    | 0.079 | 0.614    | 0.015  | 0.393    | 0.147 | 0.604    | 0.017 | 0.561    | 0.030 | 0.239    | 0.390   | 0.489    | 0.064 | 0.279    | 0.315 | 0.693    | 0.004  |        |
| Mix TG (43:0)      | 0.621    | 0.013  | 0.568    | 0.027  | 0.579    | 0.024  | 0.571    | 0.026  | 0.783    | <0.001 | 0.504    | 0.056 | 0.632    | 0.011  | 0.514    | 0.050 | 0.554    | 0.032 | 0.600    | 0.018 | 0.354    | 0.196   | 0.586    | 0.022 | 0.282    | 0.308 | 0.775    | 0.001  |        |
| TG(O-54:7)         | 0.682    | 0.005  | 0.586    | 0.022  | 0.596    | 0.019  | 0.568    | 0.027  | 0.757    | 0.001  | 0.529    | 0.043 | 0.714    | 0.003  | 0.396    | 0.143 | 0.714    | 0.003 | 0.636    | 0.011 | 0.279    | 0.315   | 0.482    | 0.069 | 0.364    | 0.182 | 0.793    | <0.001 |        |
| Mix TG (55:6)      | 0.654    | <0.001 | 0.764    | 0.001  | 0.750    | 0.001  | 0.761    | 0.001  | 0.518    | <0.001 | 0.625    | 0.013 | 0.511    | <0.001 | 0.621    | 0.046 | 0.750    | 0.001 | 0.668    | 0.007 | 0.346    | 0.206   | 0.643    | 0.010 | 0.450    | 0.092 | 0.782    | 0.001  |        |
| Mix TG (55:7)      | 0.921    | <0.001 | 0.825    | <0.001 | 0.907    | <0.001 | 0.867    | <0.001 | 0.601    | 0.029  | <0.001   | 0.775 | 0.001    | 0.571  | <0.001   | 0.632 | 0.011    | 0.882 | <0.001   | 0.771 | 0.001    | 0.629   | 0.043    | 0.767 | 0.003    | 0.668 | 0.007    | 0.743  | 0.002  |
| Mix TG (45:0)      | 0.768    | 0.001  | 0.679    | 0.005  | 0.707    | 0.003  | 0.675    | 0.006  | 0.736    | 0.002  | 0.607    | 0.016 | 0.779    | 0.001  | 0.400    | 0.140 | 0.786    | 0.001 | 0.632    | 0.011 | 0.267    | 0.459   | 0.439    | 0.101 | 0.449    | 0.060 | 0.743    | 0.002  |        |
| Mix TG (O-54:8): O | 0.625    | 0.013  | 0.550    | 0.034  | 0.571    | 0.026  | 0.489    | 0.064  | 0.650    | 0.009  | 0.475    | 0.074 | 0.604    | 0.017  | 0.332    | 0.226 | 0.629    | 0.012 | 0.500    | 0.058 | 0.289    | 0.296   | 0.350    | 0.201 | 0.329    | 0.232 | 0.693    | 0.004  |        |
| Mix TG (55:2)      | 0.650    | 0.034  | 0.404    | 0.136  | 0.429    | 0.111  | 0.348    | 0.206  | 0.587    | 0.031  | 0.396    | 0.143 | 0.518    | 0.048  | 0.293    | 0.289 | 0.543    | 0.037 | 0.450    | 0.092 | 0.289    | 0.296   | 0.339    | 0.221 | 0.289    | 0.296 | 0.664    | 0.007  |        |
| Mix TG (O-55:7): O | 0.614    | <0.001 | 0.696    | 0.004  | 0.689    | 0.004  | 0.604    | 0.017  | 0.625    | 0.012  | 0.671    | 0.006 | 0.696    | 0.004  | 0.529    | 0.043 | 0.743    | 0.002 | 0.550    | 0.034 | 0.532    | 0.041   | 0.550    | 0.034 | 0.568    | 0.027 | 0.661    | 0.007  |        |
| Mix TG (O-55:4): O | 0.507    | 0.054  | 0.371    | 0.173  | 0.389    | 0.152  | 0.325    | 0.237  | 0.590    | 0.034  | 0.432    | 0.108 | 0.489    | 0.064  | 0.364    | 0.182 | 0.511    | 0.052 | 0.457    | 0.087 | 0.396    | 0.143   | 0.389    | 0.152 | 0.332    | 0.226 | 0.661    | 0.007  |        |
| Mix TG (53:3)      | 0.546    | 0.035  | 0.446    | 0.095  | 0.493    | 0.062  | 0.357    | 0.191  | 0.514    | 0.050  | 0.457    | 0.087 | 0.436    | 0.104  | 0.375    | 0.168 | 0.471    | 0.076 | 0.396    | 0.143 | 0.414    | 0.125   | 0.318    | 0.248 | 0.368    | 0.177 | 0.546    | 0.035  |        |
| Mix TG (57:2)      | 0.696    | 0.019  | 0.624    | 0.021  | 0.689    | 0.004  | 0.489    | 0.064  | 0.389    | 0.152  | 0.579    | 0.024 | 0.486    | 0.066  | 0.550    | 0.034 | 0.368    | 0.177 | 0.600    | 0.018 | 0.486    | 0.066   | 0.400    | 0.140 | 0.389    | 0.152 | 0.389    | 0.152  |        |
| Mix TG (O-55:6): O | 0.528    | 0.044  | 0.379    | 0.184  | 0.386    | 0.156  | 0.243    | 0.249  | 0.544    | 0.069  | 0.354    | 0.186 | 0.474    | 0.074  | 0.284    | 0.284 | 0.564    | 0.016 | 0.475    | 0.074 | 0.389    | 0.152   | 0.393    | 0.147 | 0.351    | 0.277 | 0.614    | 0.016  |        |
| Mix TG (O-49:1): O | 0.714    | 0.003  | 0.689    | 0.004  | 0.675    | 0.006  | 0.679    | 0.005  | 0.775    | 0.001  | 0.543    | 0.037 | 0.711    | 0.003  | 0.407    | 0.132 | 0.689    | 0.004 | 0.621    | 0.013 | 0.261    | 0.348   | 0.500    | 0.058 | 0.386    | 0.156 | 0.714    | 0.003  |        |
| Mix TG (54:6)      | 0.736    | 0.002  | 0.600    | 0.018  | 0.575    | 0.025  | 0.561    | 0.030  | 0.661    | 0.007  | 0.600    | 0.018 | 0.714    | 0.003  | 0.429    | 0.111 | 0.761    | 0.001 | 0.604    | 0.017 | 0.421    | 0.119   | 0.504    | 0.056 | 0.518    | 0.049 | 0.739    | 0.002  |        |
| Mix TG (51:0)      | 0.693    | 0.004  | 0.689    | 0.004  | 0.704    | 0.003  | 0.614    | 0.015  | 0.600    | 0.018  | 0.539    | 0.038 | 0.593    | 0.020  | 0.339    | 0.216 | 0.632    | 0.011 | 0.418    | 0.121 | 0.321    | 0.243   | 0.275    | 0.321 | 0.432    | 0.108 | 0.584    | 0.032  |        |
| Mix TG (O-54:6)    | 0.711    | 0.003  | 0.564    | 0.028  | 0.546    | 0.035  | 0.507    | 0.054  | 0.632    | 0.011  | 0.561    | 0.030 | 0.657    | 0.008  | 0.418    | 0.121 | 0.711    | 0.003 | 0.589    | 0.021 | 0.407    | 0.132</ |          |       |          |       |          |        |        |
